# Supplementary figures and images for: Statistical Approaches to Study Exposome-Health Associations in the Context of Repeated Exposure Data: A Simulation Study
Source: PubMed Central journal article supplement — Environ Sci Technol. 2023 Oct 16;57(43):16232–43. doi: 10.1021/acs.est.3c04805 (PMC10621661; doi:10.1021/acs.est.3c04805), 2023-10-16

**A**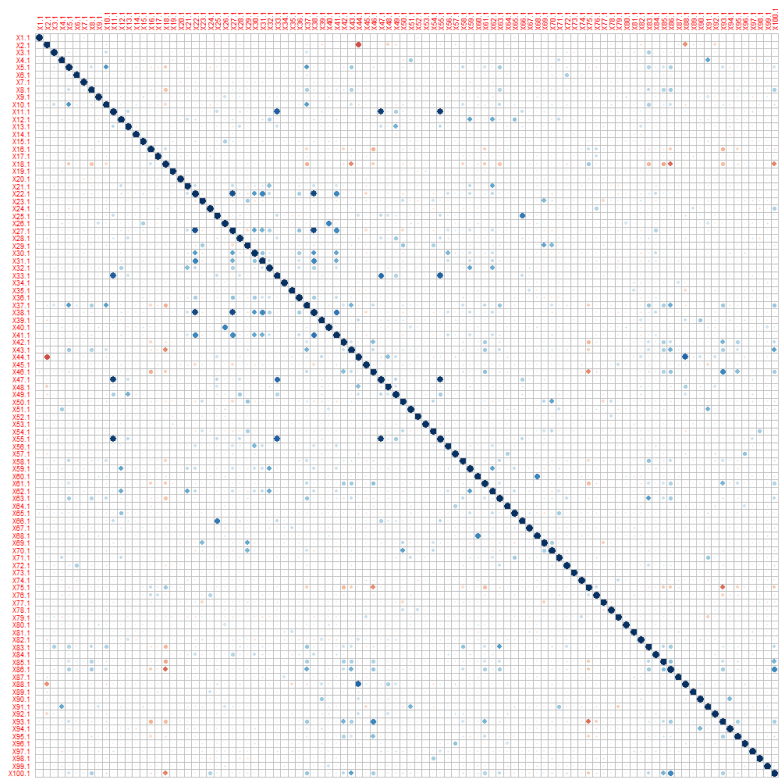**B**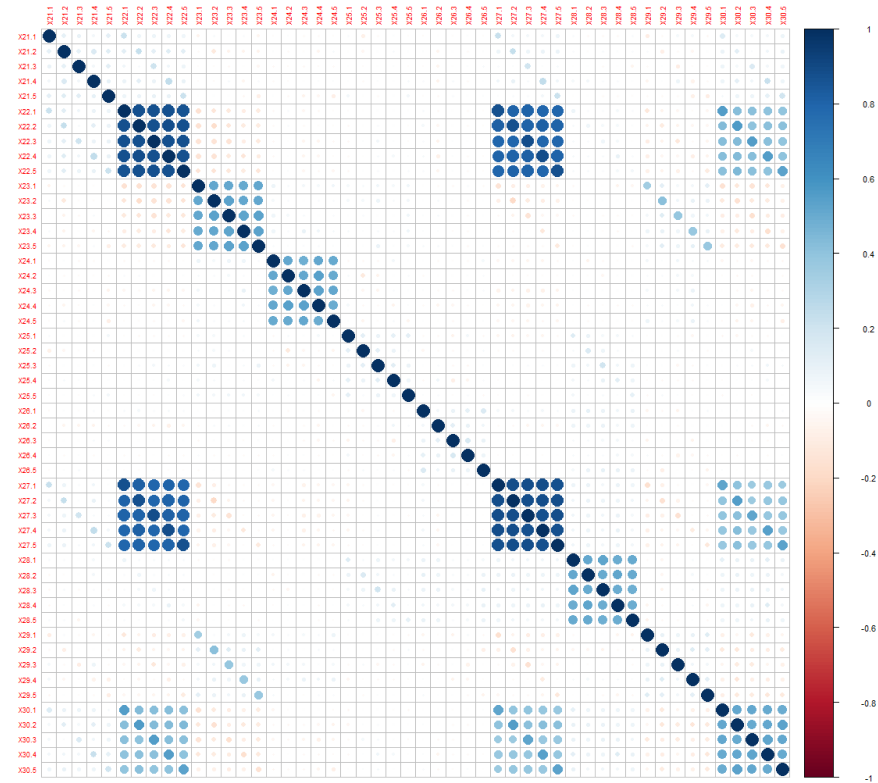

Supplement: es3c04805_si_001.pdf [file es3c04805_si_001.pdf]
